# Supplementary material
Source: PubMed Central journal article supplement (PMC2751603)
Supplement: NIHMS133517-supplement-Supplemental_Table_1.pdf [file NIHMS133517-supplement-Supplemental_Table_1.pdf]

**Supplemental Table 1. Summary of SNP Selection, Quality Control, and Inclusion.**

| Locus         | SNPs Selected from HapMap as tagging SNPs | SNPs Selected for Assay as putatively functional | Total number Genotyped | Failed HWE* | MAF <1%* | Genotyping Failure >20%* | Selected For Analysis* |
|---------------|-------------------------------------------|--------------------------------------------------|------------------------|-------------|----------|--------------------------|------------------------|
| <i>ATM</i>    | 5                                         | 2                                                | 7                      | 0/0         | 2/2      | 0/1                      | 5/5                    |
| <i>BRIP1</i>  | 24                                        | 9                                                | 33                     | 2/0         | 3/4      | 9/9                      | 8/8                    |
| <i>BARID1</i> | 20                                        | 9                                                | 29                     | 0/0         | 5/7      | 6/6                      | 8/8                    |
| <i>CTIP</i>   | 10                                        | 1                                                | 11                     | 0/0         | 3/3      | 1/1                      | 7/7                    |
| <i>MRE11</i>  | 17                                        | 2                                                | 19                     | 4/0         | 5/5      | 1/2                      | 7/7                    |
| <i>NBS1</i>   | 10                                        | 5                                                | 15                     | 7/0         | 2/2      | 1/1                      | 6/3                    |
| <i>RAD50</i>  | 4                                         | 1                                                | 5                      | 0/0         | 1/1      | 1/1                      | 4/4                    |
| <i>RAD51</i>  | 5                                         | 5                                                | 10                     | 0/1         | 3/3      | 2/3                      | 5/4                    |
| <i>TOPBP1</i> | 9                                         | 4                                                | 13                     | 1/0         | 3/4      | 1/1                      | 6/5                    |

\*Results for *BRCA1/BRCA2*. SNPs could fail quality control by more than one criterion
