# Supplementary material
Source: PubMed Central journal article supplement (PMC2751603)
Supplement: NIHMS133517-supplement-Supplemental_Table_2.pdf [file NIHMS133517-supplement-Supplemental_Table_2.pdf]

**Supplemental Table 2. SNP Labels and rs Numbers**

*BRCA1*

| Locus         | rs       | SNP Label |
|---------------|----------|-----------|
| <i>ATM</i>    | 1801516  | 1         |
|               | 664982   | 2         |
|               | 664677   | 5         |
|               | 664143   | 6         |
|               | rs4585   | 7         |
| <i>BRIP1</i>  | 12453935 | 2         |
|               | 4986764  | 4         |
|               | 16945628 | 6         |
|               | 7219969  | 7         |
|               | 16945643 | 15        |
|               | 4986765  | 21        |
|               | 2378908  | 26        |
|               | 11652980 | 33        |
| <i>BARD1</i>  | 6712055  | 2         |
|               | 16852689 | 6         |
|               | 280621   | 7         |
|               | 13021937 | 8         |
|               | 10190829 | 12        |
|               | 4234006  | 15        |
|               | 3768708  | 17        |
| 1374230       | 18       |           |
| <i>CTIP</i>   | 1010800  | 2         |
|               | 4800141  | 3         |
|               | 1010801  | 4         |
|               | 9951982  | 5         |
|               | 9961760  | 6         |
|               | 4800138  | 7         |
|               | 7243256  | 8         |
| <i>MRE11</i>  | 1783678  | 1         |
|               | 6483327  | 3         |
|               | 6483341  | 5         |
|               | 598599   | 6         |
|               | 554715   | 7         |
|               | 540199   | 14        |
|               | 588774   | 18        |
| <i>NBS1</i>   | 2735383  | 2         |
|               | 6470522  | 4         |
|               | 1805811  | 7         |
|               | 1805812  | 8         |
|               | 1805824  | 11        |
|               | 741778   | 12        |
| <i>RAD50</i>  | 2897443  | 2         |
|               | 2237060  | 3         |
|               | 1295686  | 4         |
|               | 2243204  | 5         |
| <i>RAD51</i>  | 11070291 | 1         |
|               | 2619680  | 2         |
|               | 957603   | 5         |
|               | 2619681  | 7         |
|               | 11855560 | 10        |
| <i>TOPBP1</i> | 3192149  | 1         |
|               | 17301766 | 3         |
|               | 10512909 | 5         |
|               | 2718804  | 6         |
|               | 4854588  | 10        |
|               | 3732574  | 13        |

*BRCA2*

| Locus         | rs       | SNP Label |
|---------------|----------|-----------|
| <i>ATM</i>    | 1801516  | 1         |
|               | 664982   | 2         |
|               | 3092829  | 4         |
|               | 664677   | 5         |
|               | 664143   | 6         |
|               |          |           |
| <i>BRIP1</i>  | 12453935 | 2         |
|               | 16945628 | 6         |
|               | 17614124 | 14        |
|               | 6504074  | 18        |
|               | 4986765  | 21        |
|               | 10515211 | 25        |
|               | 4988340  | 27        |
|               | 8076727  | 29        |
| <i>BARD1</i>  | 6712055  | 2         |
|               | 16852689 | 6         |
|               | 280621   | 7         |
|               | 13021937 | 8         |
|               | 13423596 | 10        |
|               | 6751923  | 13        |
|               | 3768708  | 17        |
|               | 1374230  | 18        |
| <i>CTIP</i>   | 1010800  | 2         |
|               | 4800141  | 3         |
|               | 1010801  | 4         |
|               | 9951982  | 5         |
|               | 9961760  | 6         |
|               | 4800138  | 7         |
|               | 7243256  | 8         |
| <i>MRE11</i>  | 1783678  | 1         |
|               | 6483327  | 3         |
|               | 598599   | 6         |
|               | 1014666  | 8         |
|               | 497763   | 13        |
|               | 540199   | 14        |
|               | 2508782  | 19        |
| <i>NBS1</i>   | 2697674  | 1         |
|               | 2697679  | 3         |
|               | 6470522  | 4         |
| <i>RAD50</i>  | 2897443  | 2         |
|               | 2237060  | 3         |
|               | 1295686  | 4         |
|               | 2243204  | 5         |
| <i>RAD51</i>  | 11070291 | 1         |
|               | 2619680  | 2         |
|               | 957603   | 8         |
|               | 2619681  | 10        |
| <i>TOPBP1</i> | 17301766 | 3         |
|               | 10935070 | 4         |
|               | 10512909 | 5         |
|               | 2718804  | 6         |
|               | 2887747  | 8         |
|               | 4854588  | 10        |
