# Supplementary material
Source: PubMed Central journal article supplement (PMC2751603)
Supplement: NIHMS133517-supplement-Supplemental_Table_3.pdf [file NIHMS133517-supplement-Supplemental_Table_3.pdf]

**Supplemental Table 3. Single SNP Analysis: BRCA1**

| Locus   | rs       | SNP Label | Genotype | HR          | 95% CI           | P-value      |
|---------|----------|-----------|----------|-------------|------------------|--------------|
| ATM     | 1801516  | 1         | AA       | 1.17        | 0.41-3.36        | 0.740        |
|         |          | 1         | AG       | 0.86        | 0.54-1.39        |              |
|         | 664982   | 2         | AG       | 0.81        | 0.51-1.27        | 0.487        |
|         |          | 2         | GG       | 0.84        | 0.46-1.52        |              |
|         | 664677   | 5         | CC       | 0.93        | 0.54-1.60        | 0.666        |
|         |          | 5         | CT       | 0.79        | 0.53-1.19        |              |
|         | 664143   | 6         | CT       | 0.88        | 0.58-1.32        | 0.613        |
|         |          | 6         | TT       | 0.89        | 0.50-1.57        |              |
|         | 4485     | 7         | AA       | 0.96        | 0.54-1.71        | 0.776        |
|         |          | 7         | AT       | 0.86        | 0.56-1.33        |              |
| BRIP1   | 12453935 | 2         | AG       | 0.89        | 0.30-2.62        | 0.372        |
|         |          | 2         | AA       | 0.78        | 0.52-1.16        |              |
|         | 4986764  | 4         | CT       | 0.82        | 0.56-1.19        | 0.534        |
|         |          | 4         | TT       | 1.31        | 0.77-2.24        |              |
|         | 16945628 | 6         | CT       | 0.94        | 0.65-1.36        | 0.548        |
|         |          | 6         | TT       | 0.84        | 0.48-1.46        |              |
|         | 7219969  | 7         | CC       | 1.65        | 0.92-2.95        | 0.104        |
|         |          | 7         | CT       | 1.20        | 0.82-1.73        |              |
|         | 16945643 | 15        | AG       | 0.92        | 0.52-1.63        | 0.842        |
|         |          | 15        | GG       | 1.35        | 0.10-17.5        |              |
|         | 4986765  | 21        | AA       | 1.73        | 0.88-3.40        | 0.789        |
|         |          | 21        | AG       | 0.74        | 0.48-1.15        |              |
|         | 2378908  | 26        | AA       | <b>0.16</b> | <b>0.02-1.29</b> | <b>0.044</b> |
|         |          | 26        | AG       | <b>0.73</b> | <b>0.45-1.17</b> |              |
|         | 11652980 | 33        | CG       | 1.04        | 0.61-1.76        | 0.378        |
| 33      |          | GG        | NE       | NE          |                  |              |
| BARD1   | 6712055  | 2         | CC       | 0.72        | 0.34-1.52        | 0.812        |
|         |          | 2         | CT       | 1.07        | 0.72-1.58        |              |
|         | 16852689 | 6         | CT       | 1.12        | 0.70-1.80        | 0.369        |
|         |          | 6         | TT       | 1.91        | 0.83-4.40        |              |
|         | 280621   | 7         | CC       | NE          | NE               | 0.722        |
|         |          | 7         | CT       | 1.34        | 0.85-2.09        |              |
|         | 13021937 | 8         | CC       | 0.51        | 0.24-1.05        | 0.131        |
|         |          | 8         | CT       | 0.91        | 0.62-1.33        |              |
|         | 10190829 | 12        | AT       | 0.82        | 0.53-1.25        | 0.889        |
|         |          | 12        | TT       | 1.00        | 0.58-1.71        |              |
|         | 4234006  | 15        | AA       | 0.94        | 0.26-3.41        | 0.860        |
|         |          | 15        | AG       | 0.96        | 0.59-1.56        |              |
|         | 3768708  | 17        | AG       | 0.92        | 0.62-1.37        | 0.148        |
|         |          | 17        | GG       | 0.31        | 0.10-0.91        |              |
|         | 1374230  | 18        | CC       | 1.04        | 0.56-1.93        | 0.461        |
| 18      |          | CT        | 1.35     | 0.89-2.03   |                  |              |
| CTIP    | 1010800  | 2         | AG       | <b>1.63</b> | <b>1.13-2.35</b> | <b>0.010</b> |
|         |          | 2         | GG       | <b>1.39</b> | <b>0.73-2.67</b> |              |
|         | 4800141  | 3         | AG       | 1.25        | 0.88-1.78        | 0.072        |
|         |          | 3         | GG       | 1.48        | 0.92-2.37        |              |
|         | 1010801  | 4         | CT       | 1.25        | 0.88-1.75        | 0.221        |
|         |          | 4         | TT       | 1.18        | 0.60-2.31        |              |
|         | 9951982  | 5         | AA       | 1.64        | 1.01-2.65        | 0.082        |
|         |          | 5         | AG       | 1.11        | 0.75-1.65        |              |
|         | 9961760  | 6         | AA       | 1.55        | 0.93-2.59        | 0.129        |
|         |          | 6         | AG       | 1.12        | 0.75-1.66        |              |
|         | 4800138  | 7         | AG       | 1.30        | 0.88-1.93        | 0.305        |
|         |          | 7         | GG       | 1.12        | 0.51-2.45        |              |
| 7243256 | 8        | AC        | 1.33     | 0.92-1.92   | 0.068            |              |
|         | 8        | CC        | 1.52     | 0.79-2.92   |                  |              |

**Supplemental Table 3. Single SNP Analysis: BRCA1 (Continued)**

| <b>Locus</b>  | <b>rs</b> | <b>SNP Label</b> | <b>Genotype</b> | <b>HR</b>   | <b>95% CI</b>     | <b>P-value</b> |
|---------------|-----------|------------------|-----------------|-------------|-------------------|----------------|
| <b>MRE11</b>  | 1783678   | 1                | CC              | 1.12        | 0.56-2.24         | 0.573          |
|               |           | 1                | CT              | 1.24        | 0.80-1.93         |                |
|               | 6483327   | 3                | AG              | <b>0.88</b> | <b>0.59-1.31</b>  | <b>0.025</b>   |
|               |           | 3                | GG              | <b>0.25</b> | <b>0.09-0.71</b>  |                |
|               | 6483341   | 5                | AG              | 1.60        | 1.02-2.52         | 0.570          |
|               |           | 5                | GG              | 1.20        | 0.63-2.29         |                |
|               | 598599    | 6                | AA              | 1.05        | 0.45-2.48         | 0.966          |
|               |           | 6                | AG              | 0.95        | 0.64-1.40         |                |
|               | 554715    | 7                | CC              | 1.24        | 0.63-2.44         | 0.382          |
|               |           | 7                | CT              | 1.26        | 0.81-1.95         |                |
|               | 540199    | 14               | AG              | 1.19        | 0.81-1.74         | 0.416          |
|               |           | 14               | GG              | 1.22        | 0.62-2.39         |                |
| 588774        | 18        | AA               | 1.09            | 0.55-2.17   | 0.659             |                |
|               | 18        | AG               | 1.14            | 0.72-1.79   |                   |                |
| <b>NBS1</b>   | 2735383   | 2                | CG              | 1.04        | 0.67-1.61         | 0.180          |
|               |           | 2                | GG              | 1.74        | 0.96-3.13         |                |
|               | 6470522   | 4                | AA              | 0.90        | 0.18-4.58         | 0.332          |
|               |           | 4                | AG              | 0.80        | 0.52-1.24         |                |
|               | 1805811   | 7                | CT              | 1.10        | 0.60-2.00         | 0.511          |
|               |           | 7                | TT              | <b>9.67</b> | <b>4.19-22.30</b> |                |
|               | 1805812   | 8                | CC              | <b>NE</b>   | <b>NE</b>         | <b>0.043</b>   |
|               |           | 8                | CT              | <b>1.77</b> | <b>1.02-3.05</b>  |                |
|               | 1805824   | 11               | AA              | <b>9.60</b> | <b>4.15-22.1</b>  | 0.567          |
|               |           | 11               | AG              | 1.07        | 0.59-1.95         |                |
| 7417778       | 12        | CC               | 1.73            | 0.85-3.50   | 0.075             |                |
|               | 12        | CG               | 1.28            | 0.85-1.91   |                   |                |
| <b>RAD50</b>  | 2897443   | 2                | GT              | 0.64        | 0.37-1.10         | 0.213          |
|               |           | 2                | TT              | 0.96        | 0.44-2.13         |                |
|               | 2237060   | 3                | GG              | 1.40        | 0.80-2.44         | 0.288          |
|               |           | 3                | GT              | 1.09        | 0.71-1.66         |                |
|               | 1295686   | 4                | CT              | 0.60        | 0.38-0.96         | 0.258          |
|               |           | 4                | TT              | 0.87        | 0.34-2.19         |                |
| 2243204       | 5         | CT               | 0.90            | 0.46-1.79   | 0.887             |                |
|               | 5         | TT               | 2.38            | 1.22-4.64   |                   |                |
| <b>RAD51</b>  | 11070291  | 1                | AA              | 0.96        | 0.56-1.66         | 0.890          |
|               |           | 1                | AG              | 1.05        | 0.68-1.62         |                |
|               | 2619680   | 2                | AA              | 1.00        | 0.59-1.71         | 0.991          |
|               |           | 2                | AC              | 1.05        | 0.67-1.64         |                |
|               | 957603    | 5                | CT              | 1.11        | 0.74-1.64         | 0.979          |
|               |           | 5                | TT              | 0.96        | 0.48-1.94         |                |
|               | 2619681   | 7                | CT              | 0.96        | 0.63-1.46         | 0.226          |
|               |           | 7                | TT              | 0.19        | 0.05-0.84         |                |
|               | 11855560  | 10               | CT              | 1.08        | 0.70-1.65         | 0.782          |
|               |           | 10               | TT              | 1.07        | 0.63-1.81         |                |
| <b>TOPBP1</b> | 3192149   | 1                | AA              | 1.38        | 0.81-2.35         | 0.312          |
|               |           | 1                | AC              | 1.14        | 0.74-1.74         |                |
|               | 17301766  | 3                | AA              | 0.93        | 0.28-3.07         | 0.822          |
|               |           | 3                | AG              | 0.96        | 0.67-1.39         |                |
|               | 10512909  | 5                | CT              | 0.91        | 0.61-1.35         | 0.682          |
|               |           | 5                | TT              | 0.99        | 0.33-2.90         |                |
|               | 2718804   | 6                | AA              | 1.60        | 0.75-3.44         | 0.424          |
|               |           | 6                | AG              | 1.05        | 0.62-1.76         |                |
|               | 4854588   | 10               | AA              | 1.05        | 0.53-2.08         | 0.816          |
|               |           | 10               | AC              | 1.05        | 0.69-1.59         |                |
| 3732574       | 13        | CC               | 1.66            | 0.24-11.3   | 0.845             |                |
|               | 13        | CT               | 1.04            | 0.57-1.89   |                   |                |
