# Supplementary material
Source: PubMed Central journal article supplement (PMC2751603)
Supplement: NIHMS133517-supplement-Supplemental_Table_4.pdf [file NIHMS133517-supplement-Supplemental_Table_4.pdf]

Supplemental Table 4. Single SNP Analysis: *BRCA2*

| Locus        | rs       | SNP Label | Genotype | HR        | 95% CI     | P-value |
|--------------|----------|-----------|----------|-----------|------------|---------|
| <i>ATM</i>   | 1801516  | 1         | AA       | 3.87      | 0.40-37.38 | 0.759   |
|              |          | 1         | AG       | 0.84      | 0.37-1.91  |         |
|              | 664982   | 2         | AG       | 0.69      | 0.30-1.58  | 0.547   |
|              |          | 2         | GG       | 1.80      | 0.75-4.32  |         |
|              | 3092829  | 4         | CC       | NE        | NE         | 0.788   |
|              |          | 4         | CT       | 0.70      | 0.05-9.56  |         |
|              | 664677   | 5         | CC       | 1.25      | 0.40-3.86  | 0.908   |
|              |          | 5         | CT       | 0.68      | 0.31-1.50  |         |
|              | 664143   | 6         | CT       | 0.71      | 0.32-1.59  | 0.861   |
|              |          | 6         | TT       | 1.50      | 0.52-4.33  |         |
| <i>BRIP1</i> | 12453935 | 2         | AA       | 1.48      | 0.35-6.24  | 0.128   |
|              |          | 2         | AG       | 1.87      | 0.90-3.88  |         |
|              | 16945628 | 6         | CT       | 1.20      | 0.51-2.79  | 0.458   |
|              |          | 6         | TT       | 1.66      | 0.45-6.14  |         |
|              | 17614124 | 14        | CT       | 0.72      | 0.29-1.78  | 0.829   |
|              |          | 14        | TT       | 1.25      | 0.29-5.39  |         |
|              | 6504074  | 18        | GT       | 0.68      | 0.30-1.53  | 0.565   |
|              |          | 18        | TT       | 0.87      | 0.20-3.91  |         |
|              | 4986765  | 21        | AA       | 0.49      | 0.12-1.95  | 0.296   |
|              |          | 21        | AG       | 0.64      | 0.21-2.02  |         |
|              | 10515211 | 25        | AG       | 1.14      | 0.50-2.63  | 0.985   |
|              |          | 25        | GG       | 0.71      | 0.14-3.63  |         |
|              | 4988340  | 27        | AA       | 1.38      | 0.42-4.49  | 0.973   |
|              |          | 27        | AG       | 0.63      | 0.25-1.56  |         |
| 8076727      | 29       | AA        | 1.12     | 0.24-5.24 | 0.712      |         |
|              | 29       | AG        | 0.66     | 0.27-1.60 |            |         |
| <i>BARD1</i> | 6712055  | 2         | CC       | 9.05      | 2.95-27.70 | 0.008   |
|              |          | 2         | CT       | 1.33      | 0.59-2.98  |         |
|              | 16852689 | 6         | CT       | 0.48      | 0.20-1.18  | 0.246   |
|              |          | 6         | TT       | 0.83      | 0.11-6.08  |         |
|              | 280621   | 7         | CT       | NE        | NE         | 0.628   |
|              |          | 7         | CC       | 0.88      | 0.29-2.73  |         |
|              | 13021937 | 8         | CC       | 1.28      | 0.31-5.26  | 0.971   |
|              |          | 8         | CT       | 0.90      | 0.40-2.01  |         |
|              | 13423596 | 10        | AA       | NE        | NE         | 0.269   |
|              |          | 10        | AG       | 0.79      | 0.28-2.25  |         |
|              | 6751923  | 13        | CC       | 0.75      | 0.08-6.58  | 0.558   |
|              |          | 13        | CT       | 1.49      | 0.60-3.68  |         |
|              | 3768708  | 17        | AG       | 0.66      | 0.26-1.70  | 0.525   |
|              |          | 17        | GG       | 3.14      | 0.92-10.7  |         |
| 1374230      | 18       | CC        | 0.16     | 0.02-1.35 | 0.152      |         |
|              | 18       | CT        | 0.72     | 0.31-1.64 |            |         |
| <i>CTIP</i>  | 1010800  | 2         | AG       | 1.50      | 0.61-3.68  | 0.297   |
|              |          | 2         | GG       | 1.35      | 0.50-3.65  |         |
|              | 4800141  | 3         | AG       | 1.00      | 0.51-1.97  | 0.755   |
|              |          | 3         | GG       | 1.36      | 0.43-4.32  |         |
|              | 1010801  | 4         | CT       | 1.13      | 0.49-2.62  | 0.649   |
|              |          | 4         | TT       | 1.32      | 0.33-5.23  |         |
|              | 9951982  | 5         | AA       | 2.01      | 0.64-6.34  | 0.259   |
|              |          | 5         | AG       | 1.25      | 0.63-2.49  |         |
|              | 9961760  | 6         | AA       | 2.16      | 0.67-7.00  | 0.168   |
|              |          | 6         | AG       | 1.44      | 0.71-2.92  |         |
|              | 4800138  | 7         | AG       | 1.70      | 0.64-4.53  | 0.177   |
| 7            |          | GG        | 1.91     | 0.45-8.14 |            |         |
| 7243256      | 8        | AC        | 1.65     | 0.66-4.15 | 0.141      |         |
|              | 8        | CC        | 2.16     | 0.70-6.67 |            |         |

Supplemental Table 4: Single SNP Analysis: *BRCA2* (Continued)

| Locus         | rs       | SNP Label | Genotype | HR           | 95% CI           | P-value      |
|---------------|----------|-----------|----------|--------------|------------------|--------------|
| <i>MRE11</i>  | 1783678  | 1         | CC       | 0.42         | 0.12-1.41        | 0.404        |
|               |          |           | CT       | 1.21         | 0.51-2.88        |              |
|               | 6483327  | 3         | AG       | 0.57         | 0.21-1.56        | 0.511        |
|               |          |           | GG       | 0.77         | 0.13-4.55        |              |
|               | 598599   | 6         | AA       | <b>0.85</b>  | <b>0.10-7.53</b> | <b>0.023</b> |
|               |          |           | AG       | <b>3.21</b>  | <b>1.24-8.33</b> |              |
|               | 1014666  | 8         | CC       | 2.50         | 0.58-10.8        | 0.103        |
|               |          |           | CT       | 3.29         | 0.99-10.8        |              |
|               | 497763   | 13        | CT       | 2.24         | 0.76-6.60        | 0.075        |
|               |          |           | TT       | 2.87         | 0.77-10.7        |              |
|               | 540199   | 14        | AG       | <b>3.04</b>  | <b>1.15-8.05</b> | <b>0.024</b> |
|               |          |           | GG       | <b>2.22</b>  | <b>0.46-10.7</b> |              |
|               | 2508782  | 19        | AA       | 1.34         | 0.38-4.70        | 0.506        |
|               |          |           | AG       | 1.51         | 0.55-4.11        |              |
| <i>NBS1</i>   | 2697674  | 1         | AG       | 0.45         | 0.17-1.18        | 0.577        |
|               |          |           | GG       | 0.93         | 0.33-2.64        |              |
|               | 2697679  | 3         | AC       | 0.50         | 0.17-1.46        | 0.942        |
|               |          |           | CC       | 1.23         | 0.43-3.53        |              |
|               | 6470522  | 4         | AA       | 12.46        | 1.89-82.0        | 0.974        |
|               |          |           | AG       | 0.66         | 0.18-2.38        |              |
| <i>RAD50</i>  | 2897443  | 2         | GT       | 0.44         | 0.14-1.37        | 0.489        |
|               |          |           | TT       | 1.34         | 0.21-8.74        |              |
|               | 2237060  | 3         | GG       | 1.00         | 0.34-2.96        | 0.797        |
|               |          |           | GT       | 0.71         | 0.28-1.84        |              |
|               | 1295686  | 4         | CT       | 0.94         | 0.30-2.98        | 0.764        |
|               |          |           | TT       | 0.50         | 0.05-4.58        |              |
|               | 2243204  | 5         | CT       | 0.68         | 0.22-2.10        | 0.365        |
|               |          |           | TT       | NE           | NE               |              |
| <i>RAD51</i>  | 11070291 | 1         | AA       | 0.47         | 0.14-1.54        | 0.183        |
|               |          |           | AG       | 0.64         | 0.24-1.69        |              |
|               | 2619680  | 2         | AA       | 0.34         | 0.11-1.19        | 0.077        |
|               |          |           | AC       | 0.55         | 0.21-1.43        |              |
|               | 957603   | 8         | AT       | <b>5.57</b>  | <b>1.35-22.9</b> | <b>0.000</b> |
|               |          |           | TT       | <b>11.27</b> | <b>2.28-55.7</b> |              |
|               | 2619681  | 10        | CT       | 0.71         | 0.27-1.86        | 0.325        |
|               |          |           | TT       | 0.55         | 0.15-2.05        |              |
| <i>TOPBP1</i> | 17301766 | 3         | AA       | 0.93         | 0.22-3.96        | 0.956        |
|               |          |           | AG       | 1.00         | 0.47-2.13        |              |
|               | 10935070 | 4         | AG       | 0.83         | 0.36-1.89        | 0.704        |
|               |          |           | GG       | 1.70         | 0.52-5.50        |              |
|               | 10512909 | 5         | CT       | 1.36         | 0.63-2.9         | 0.652        |
|               |          |           | TT       | 0.70         | 0.08-5.85        |              |
|               | 2718804  | 6         | AA       | NE           | NE               | 0.278        |
|               |          |           | AG       | 0.63         | 0.23-1.72        |              |
|               | 2887747  | 8         | AA       | NE           | NE               | 0.376        |
|               |          |           | AG       | 0.72         | 0.28-1.84        |              |
|               | 4854588  | 10        | AA       | NE           | NE               | 0.821        |
|               |          |           | AC       | 1.01         | 0.40-2.50        |              |
